# Supplementary material for: Pollution risk estimation of the Cu element in atmospheric sedimentation samples by laser induced breakdown spectroscopy (LIBS) combined with random forest (RF)
Source: Royal Society of Chemistry journal article supplement (doi:10.1039/d1ay00879j), 2021-01-01
Supplement: d1ay00879j1.pdf [file d1ay00879j1.pdf]

## Appendix

The geo-accumulation Index

$$I_{geo} = 1 + \log \frac{C_n}{1.5 B_n} \quad (1)$$

where  $C_n$  is the measured concentration of  $n$  in atmospheric sedimentation samples, and  $B_n$  is the geochemical background value of  $n$  in the earth's crust. A factor of 1.5 is used to compensate for changes that may be caused by changes in sediment lithology, and it takes into account the difference in background values.

Enrichment factor

$$EF = \frac{C_n(\text{sample})/C_{ref}(\text{sample})}{B_n(\text{baseline})/B_{ref}(\text{baseline})} \quad (2)$$

where  $C_n$  is the sample concentration of the researched element, and  $B_n$  is the reference concentration of the researched element.  $C_{ref}$  and  $B_{ref}$  are the sample concentration and reference concentration of the referenced element.

The Potential Ecological Risk Index

$$F_i = \frac{c_i}{B_i} \quad (3)$$

$$E_r = T_i \times F_i \quad (4)$$

$$RI = \sum E_r \quad (5)$$

$F_i$  is the single metal pollution coefficient,  $B_i$  is the metal background value,  $C_i$  is the metal concentration in the dust,  $E_r$  is the single element potential ecological risk index,  $RI$  is the multi-element comprehensive potential ecological risk index and  $T_i$  is the metal toxicity factor.

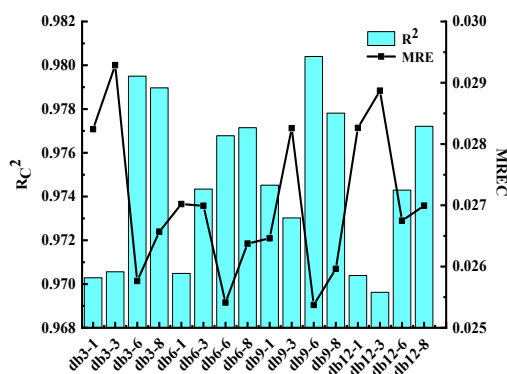

**Fig S1 Influence of different wavelet basis function and decomposition layer on predictive performance of RF calibration model of  $I_{geo}$**

**Table S1 Standard of contamination degree by Geo-accumulation index**

| $I_{geo}$            | Class | Pollution level                   |
|----------------------|-------|-----------------------------------|
| $I_{geo} < 0$        | 0     | unpolluted                        |
| $0 \leq I_{geo} < 1$ | 1     | Unpolluted to moderately polluted |
| $1 \leq I_{geo} < 2$ | 2     | Moderately polluted               |
| $2 \leq I_{geo} < 3$ | 3     | Moderately to strongly polluted   |
| $3 \leq I_{geo} < 4$ | 4     | strongly polluted                 |
| $4 \leq I_{geo} < 5$ | 5     | strongly to extremely polluted    |
| $I_{geo} > 5$        | 6     | Extremely polluted                |

**Table S2 Contamination categories based on EF values**

| EF                | Class | Pollution level          |
|-------------------|-------|--------------------------|
| $EF < 2$          | 1     | Minimal pollution        |
| $2 \leq EF < 5$   | 2     | Moderate pollution       |
| $5 \leq EF < 20$  | 3     | Significant pollution    |
| $20 \leq EF < 40$ | 4     | Very high pollution      |
| $EF \geq 40$      | 5     | Extremely high pollution |

**Table S3 Toxicity coefficient standard of heavy metals**

| Element         | Al | Cu | Cd | Pb | Cr | Zn |
|-----------------|----|----|----|----|----|----|
| Toxicity factor | 1  | 5  | 30 | 5  | 2  | 1  |

---

(Hakanson)

---

**Table S4 Pollution categories based on  $E_r$  and RI**

| $E_r$                | RI                  | Class | Pollution level                        |
|----------------------|---------------------|-------|----------------------------------------|
| $E_r < 40$           | $RI < 150$          | 1     | Low potential ecological risk          |
| $40 \leq E_r < 80$   | $150 \leq RI < 300$ | 2     | Moderate potential ecological risk     |
| $80 \leq E_r < 160$  | $300 \leq RI < 600$ | 3     | Considerable potential ecological risk |
| $160 \leq E_r < 320$ | $RI \geq 600$       | 4     | High potential ecological risk         |
| $E_r \geq 320$       |                     | 5     | Very high ecological risk              |
